# Supplementary material for: Integrated Multi-Omics Profiling of Young Breast Cancer Patients Reveals a Correlation Between Galactose Metabolism Pathway and Poor Disease-free Survival
Source: Preprints.org preprint supplement (doi:10.20944/preprints202308.0757.v1), 2023-08-09
Supplement: Supplementary file 1 [file supplementary]

## Sheet: Sheet1
Supplementary Table 1: Primers used in this study
Genes		Sequence (5'to3')
UGP2		Forward		ATGTCTCAAGATGGTGCTTCTCA
		Reverse		GGTGTGCTCAAATTCATGTGATG
G6PC3		Forward		CGAGGCGCTACAGAACCAG
		Reverse		CACTCGGTGATGAGGCTGAT
GALK1		Forward		TCGGTGGGCCAACTATGTC
		Reverse		GCAGCTATTGTGCCCGAGT
ITGA6		Forward		ATGCACGCGGATCGAGTTT
		Reverse		TTCCTGCTTCGTATTAACATGCT
ITGB1		Forward		CCTACTTCTGCACGATGTGATG
		Reverse		CCTTTGCTACGGTTGGTTACATT
CD44		Forward		CTGCCGCTTTGCAGGTGTA
		Reverse		CATTGTGGGCAAGGTGCTATT
